# Supplementary material for: Chemically grafting Cu(ii)-Schiff base complex on magnetic graphene oxide–cobalt ferrite (GO/CoFe2O4) nanocomposite for the selective and ultrafast removal of toxic anionic dyes and dichromate–chromate anions from water
Source: Royal Society of Chemistry journal article supplement (doi:10.1039/d3nj00116d), 2023-01-01
Supplement: d3nj00116d1.pdf [file d3nj00116d1.pdf]

## Supplementary Data

### Chemically Grafting Cu(II)-Schiff base complex on magnetic graphene oxide-cobalt ferrite (GO/CoFe<sub>2</sub>O<sub>4</sub>) nanocomposite for selective and ultrafast removal of toxic anionic dyes and dichromate-chromate anions from water

Ladan Nirumand and Saeed Farhadi\*

Department of Chemistry, Lorestan University, Khorramabad 68151-44316, Iran

\*Corresponding author: E-mail: farhadi.s@lu.ac.ir

Tel: +986633120611, fax: +986633120618

**Table S1.** Chemical structures and selected properties of dye molecules.

| Name                | structure                                                                            | $\lambda_{\max}$ (nm) |
|---------------------|--------------------------------------------------------------------------------------|-----------------------|
| Methyl Orange (MO)  | 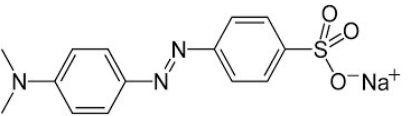  | 462                   |
| Indigo Carmine (IC) |  | 609                   |
| Congo Red (CR)      |  | 485                   |
| Orange II (OR)      |   | 484                   |

Bromocresol (BC)

588

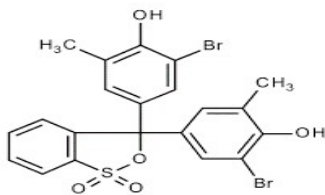

Titan Yellow (TY)

410

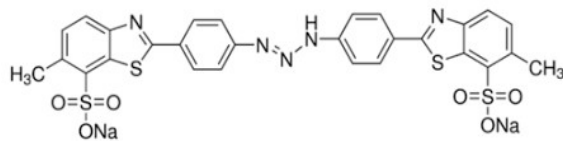

Methylene Blue (MB)

664

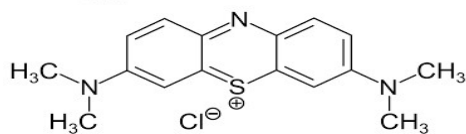

Rhodamine B (RhB)

543

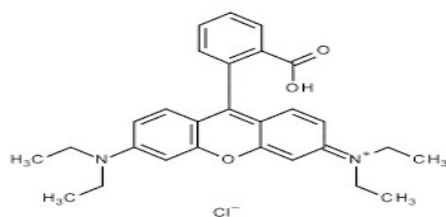

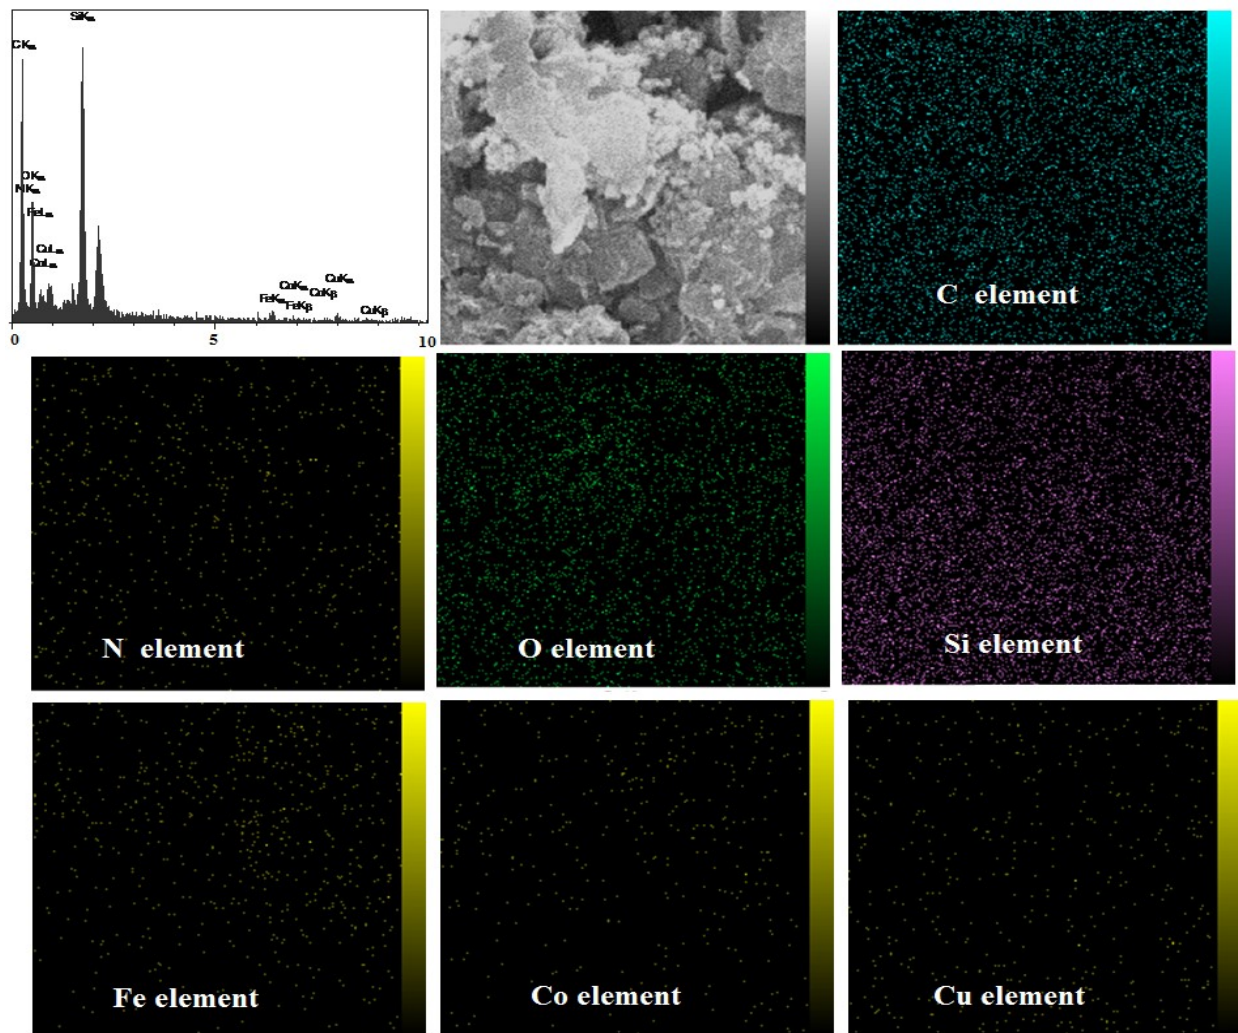

**Fig. S1.** The EDX analysis and mapping images of Cu(Schiff base)-GO/CoFe<sub>2</sub>O<sub>4</sub> composite.

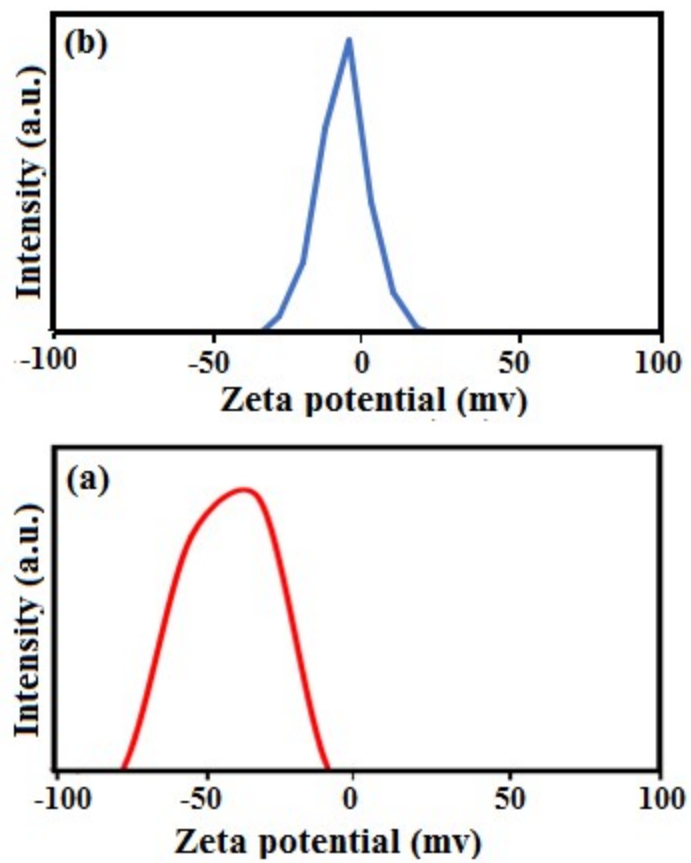

Fig. S2. Zeta potential curves of (a) GO and (b) Cu(Schiff base)-GO/CoFe<sub>2</sub>O<sub>4</sub> .

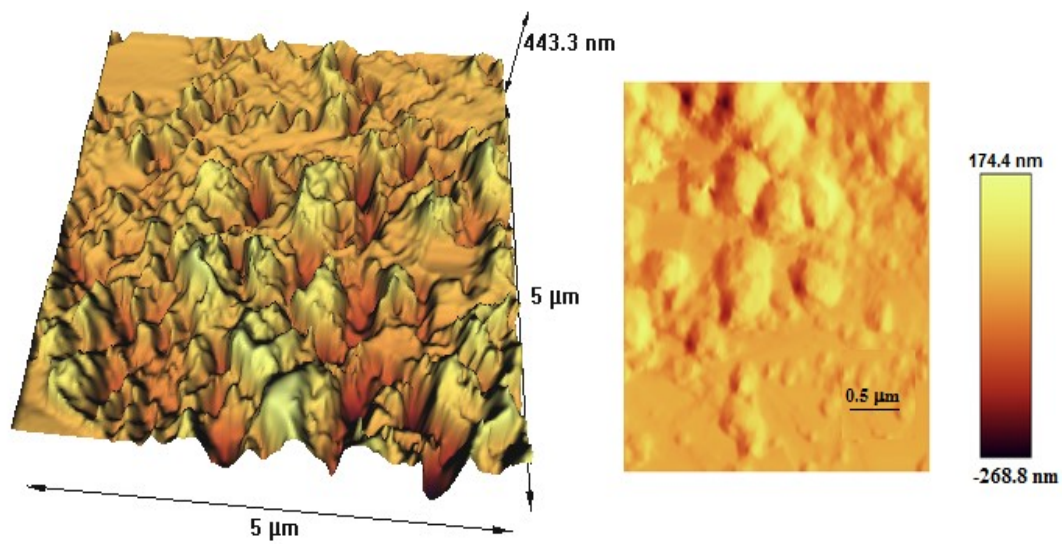

**Fig. S3.** 2D and 3D AFM micrographs of Cu(Schiff base)-GO/CoFe<sub>2</sub>O<sub>4</sub> nanocomposite.

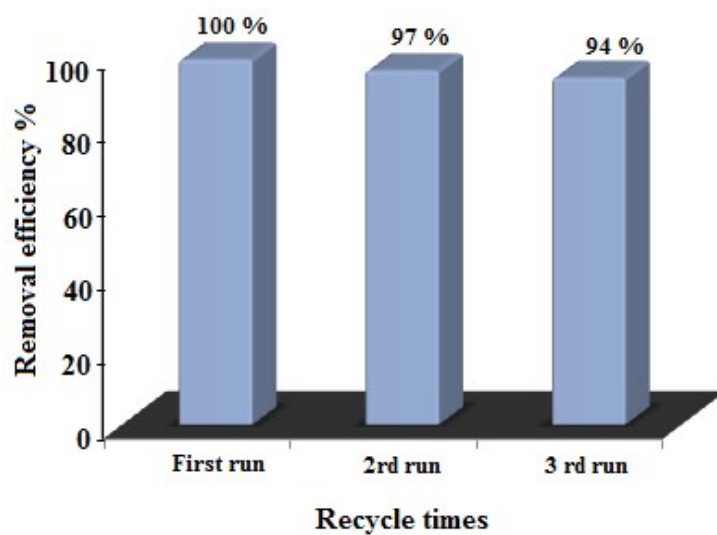

**Fig. S4.** The reusability curve of the Cu(Schiff base)-GO/CoFe<sub>2</sub>O<sub>4</sub> on the adsorption of BC after three cycles.

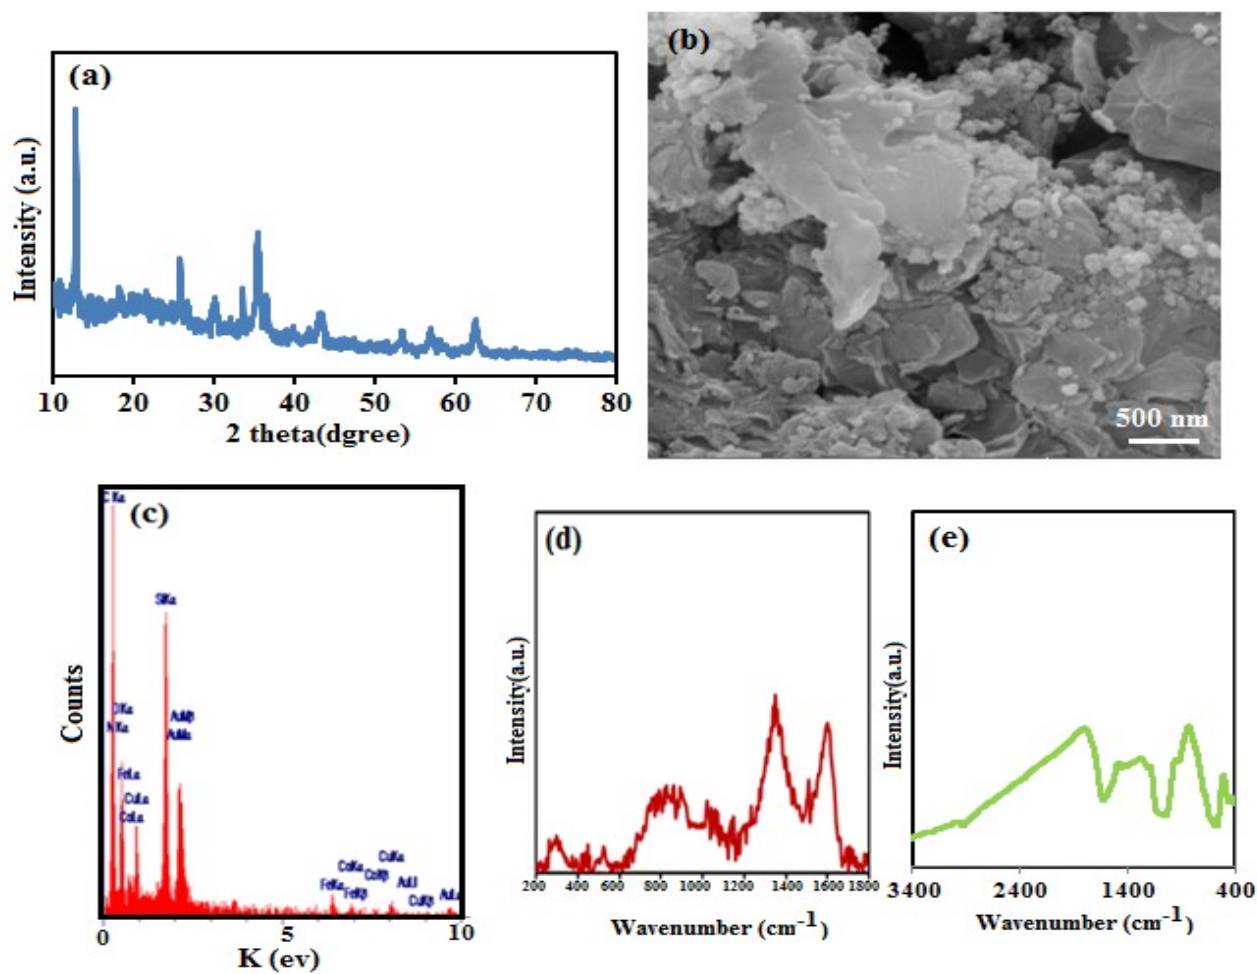

Fig. S5. (a) XRD, (b) SEM, (c) EDX, (d) Raman and (e) IR analyses of the reused Cu(Schiff base)-GO/CoFe<sub>2</sub>O<sub>4</sub> on the adsorption of BR after three cycles.
